# Supplementary material for: LAT1 and ASCT2 Related microRNAs as Potential New Therapeutic Agents against Colorectal Cancer Progression
Source: MDPI journal article supplement (doi:10.3390/biomedicines9020195), 2021-02-16
Supplement: s1 [file s1]

## Supplementary material

**Table S1.** GO Cellular Component enrichment results for terms with FDR  $P < 0.01$

| Number of Genes | Term name  | Description                                    | FDR      |
|-----------------|------------|------------------------------------------------|----------|
| 86              | GO.0070013 | intracellular organelle lumen                  | 7.79E-10 |
| 81              | GO.0005829 | cytosol                                        | 8.09E-9  |
| 9               | GO.1902911 | protein kinase complex                         | 2.92E-6  |
| 35              | GO.0098805 | whole membrane                                 | 4.12E-6  |
| 22              | GO.0009986 | cell surface                                   | 4.63E-6  |
| 44              | GO.0031982 | vesicle                                        | 7.96E-6  |
| 18              | GO.0000785 | chromatin                                      | 8.09E-6  |
| 14              | GO.0045121 | membrane raft                                  | 1.15E-5  |
| 10              | GO.0005741 | mitochondrial outer membrane                   | 9.03E-5  |
| 30              | GO.0005739 | mitochondrion                                  | 2.8E-4   |
| 65              | GO.0032991 | protein-containing complex                     | 4.4E-4   |
| 8               | GO.0090575 | RNA polymerase II transcription factor complex | 4.7E-4   |
| 23              | GO.0005615 | extracellular space                            | 0.0014   |
| 23              | GO.0043005 | neuron projection                              | 0.0015   |
| 12              | GO.0005911 | cell-cell junction                             | 0.0023   |
| 54              | GO.0043232 | intracellular non-membrane-bounded organelle   | 0.0027   |
| 6               | GO.0005796 | Golgi lumen                                    | 0.0029   |
| 26              | GO.0005794 | Golgi apparatus                                | 0.0037   |
| 2               | GO.0097129 | cyclin D2-CDK4 complex                         | 0.006    |
| 29              | GO.0005783 | endoplasmic reticulum                          | 0.006    |
| 5               | GO.0070062 | extracellular exosome                          | 0.0063   |
| 21              | GO.0031967 | organelle envelope                             | 0.007    |
| 9               | GO.0005788 | endoplasmic reticulum lumen                    | 0.0093   |

**Table S2.** GO Molecular Function enrichment results for terms with FDR  $P < 0.01$ 

| Number of Genes | Term name  | Description                                    | FDR      |
|-----------------|------------|------------------------------------------------|----------|
| 55              | GO.0042802 | identical protein binding                      | 3.76E-15 |
| 58              | GO.0019899 | enzyme binding                                 | 5.04E-13 |
| 29              | GO.0008134 | transcription factor binding                   | 1.65E-11 |
| 27              | GO.0019901 | protein kinase binding                         | 2.75E-10 |
| 25              | GO.0046982 | protein heterodimerization activity            | 3.94E-10 |
| 21              | GO.0004674 | protein serine/threonine kinase activity       | 2.57E-8  |
| 26              | GO.0019904 | protein domain specific binding                | 2.92E-8  |
| 27              | GO.0042803 | protein homodimerization activity              | 1.51E-7  |
| 27              | GO.0003690 | double-stranded DNA binding                    | 1.51E-7  |
| 37              | GO.0005102 | signaling receptor binding                     | 2.36E-7  |
| 79              | GO.1901363 | heterocyclic compound binding                  | 9.41E-7  |
| 27              | GO.0044877 | protein-containing complex binding             | 2.06E-6  |
| 6               | GO.0051721 | protein phosphatase 2A binding                 | 9.46E-6  |
| 37              | GO.0098772 | molecular function regulator                   | 1.02E-5  |
| 48              | GO.0043168 | anion binding                                  | 1.02E-5  |
| 8               | GO.0019199 | transmembrane receptor protein kinase activity | 1.33E-5  |
| 7               | GO.0046332 | SMAD binding                                   | 8.12E-5  |
| 5               | GO.0042056 | chemoattractant activity                       | 2.2E-4   |
| 3               | GO.0051434 | BH3 domain binding                             | 3.8E-4   |
| 7               | GO.0016922 | nuclear receptor binding                       | 7.0E-4   |
| 3               | GO.0070878 | primary miRNA binding                          | 9.1E-4   |
| 14              | GO.0003682 | chromatin binding                              | 0.0013   |
| 6               | GO.0042562 | hormone binding                                | 0.0015   |
| 14              | GO.0003712 | transcription coregulator activity             | 0.0021   |
| 8               | GO.0019887 | protein kinase regulator activity              | 0.0027   |
| 4               | GO.0001221 | transcription cofactor binding                 | 0.0029   |
| 5               | GO.0033613 | activating transcription factor binding        | 0.0033   |
| 10              | GO.0031625 | ubiquitin protein ligase binding               | 0.0034   |
| 6               | GO.0042826 | histone deacetylase binding                    | 0.0037   |
| 6               | GO.0005178 | integrin binding                               | 0.0057   |
| 2               | GO.0051425 | PTB domain binding                             | 0.0073   |
| 3               | GO.0005158 | insulin receptor binding                       | 0.0091   |
| 2               | GO.0043559 | insulin binding                                | 0.0097   |

**Table S3.** GO Biological Process enrichment results for terms with FDR  $P < 0.01$ 

| Number of Genes | Term name  | Description                                               | FDR      |
|-----------------|------------|-----------------------------------------------------------|----------|
| 78              | GO.0042127 | regulation of cell population proliferation               | 1.89E-35 |
| 83              | GO.0071310 | cellular response to organic substance                    | 2.33E-30 |
| 51              | GO.0060548 | negative regulation of cell death                         | 1.23E-23 |
| 46              | GO.0051270 | regulation of cellular component movement                 | 1.21E-20 |
| 46              | GO.0006468 | protein phosphorylation                                   | 4.66E-20 |
| 59              | GO.0045595 | regulation of cell differentiation                        | 3.6E-19  |
| 61              | GO.0010628 | positive regulation of gene expression                    | 4.23E-19 |
| 47              | GO.0009628 | response to abiotic stimulus                              | 7.57E-19 |
| 54              | GO.0048585 | negative regulation of response to stimulus               | 3.16E-18 |
| 44              | GO.0051338 | regulation of transferase activity                        | 6.31E-18 |
| 64              | GO.0009605 | response to external stimulus                             | 7.42E-18 |
| 41              | GO.1901701 | cellular response to oxygen-containing compound           | 1.04E-16 |
| 34              | GO.0008283 | cell population proliferation                             | 7.89E-15 |
| 30              | GO.0070848 | response to growth factor                                 | 9.68E-15 |
| 27              | GO.0048732 | gland development                                         | 1.25E-14 |
| 33              | GO.0040008 | regulation of growth                                      | 2.89E-14 |
| 39              | GO.0022603 | regulation of anatomical structure morphogenesis          | 2.96E-14 |
| 42              | GO.0051726 | regulation of cell cycle                                  | 3.38E-14 |
| 94              | GO.1901564 | organonitrogen compound metabolic process                 | 1.36E-13 |
| 41              | GO.0051130 | positive regulation of cellular component organization    | 1.54E-13 |
| 49              | GO.0009888 | tissue development                                        | 2.03E-13 |
| 32              | GO.0008285 | negative regulation of cell population proliferation      | 2.1E-13  |
| 15              | GO.0043535 | regulation of blood vessel endothelial cell migration     | 3.54E-13 |
| 29              | GO.0009611 | response to wounding                                      | 3.62E-13 |
| 23              | GO.0050678 | regulation of epithelial cell proliferation               | 3.83E-13 |
| 25              | GO.2001233 | regulation of apoptotic signaling pathway                 | 4.63E-13 |
| 32              | GO.0007167 | enzyme linked receptor protein signaling pathway          | 5.8E-13  |
| 43              | GO.0080134 | regulation of response to stress                          | 5.85E-13 |
| 36              | GO.1902533 | positive regulation of intracellular signal transduction  | 3.26E-12 |
| 14              | GO.0048145 | regulation of fibroblast proliferation                    | 3.26E-12 |
| 30              | GO.0010942 | positive regulation of cell death                         | 5.24E-12 |
| 21              | GO.1901214 | regulation of neuron death                                | 6.44E-12 |
| 89              | GO.0016043 | cellular component organization                           | 9.06E-12 |
| 34              | GO.0009790 | embryo development                                        | 1.03E-11 |
| 45              | GO.0033554 | cellular response to stress                               | 1.06E-11 |
| 17              | GO.2000377 | regulation of reactive oxygen species metabolic process   | 1.15E-11 |
| 26              | GO.0071407 | cellular response to organic cyclic compound              | 1.5E-11  |
| 19              | GO.0050730 | regulation of peptidyl-tyrosine phosphorylation           | 1.91E-11 |
| 28              | GO.0035239 | tube morphogenesis                                        | 2.85E-11 |
| 15              | GO.0016202 | regulation of striated muscle tissue development          | 3.29E-11 |
| 25              | GO.0009991 | response to extracellular stimulus                        | 4.12E-11 |
| 21              | GO.0001101 | response to acid chemical                                 | 4.44E-11 |
| 19              | GO.0090287 | regulation of cellular response to growth factor stimulus | 5.42E-11 |
| 41              | GO.0002682 | regulation of immune system process                       | 7.85E-11 |
| 27              | GO.0030155 | regulation of cell adhesion                               | 2.0E-10  |
| 45              | GO.0051049 | regulation of transport                                   | 3.28E-10 |
| 14              | GO.0048660 | regulation of smooth muscle cell proliferation            | 3.5E-10  |
| 30              | GO.0072359 | circulatory system development                            | 4.67E-10 |
| 20              | GO.0043405 | regulation of MAP kinase activity                         | 6.45E-10 |
| 53              | GO.0002376 | immune system process                                     | 7.39E-10 |
| 15              | GO.0048639 | positive regulation of developmental growth               | 8.65E-10 |
| 14              | GO.0033135 | regulation of peptidyl-serine phosphorylation             | 8.65E-10 |
| 34              | GO.0051248 | negative regulation of protein metabolic process          | 1.19E-9  |
| 31              | GO.0042493 | response to drug                                          | 1.25E-9  |
| 27              | GO.0045596 | negative regulation of cell differentiation               | 1.34E-9  |
| 16              | GO.2000027 | regulation of animal organ morphogenesis                  | 1.69E-9  |
| 27              | GO.0060322 | head development                                          | 1.73E-9  |
| 13              | GO.0035270 | endocrine system development                              | 2.27E-9  |

|    |            |                                                                                  |         |
|----|------------|----------------------------------------------------------------------------------|---------|
| 25 | GO.0002520 | immune system development                                                        | 2.54E-9 |
| 14 | GO.0051897 | positive regulation of protein kinase B signaling                                | 4.46E-9 |
| 12 | GO.0001952 | regulation of cell-matrix adhesion                                               | 6.48E-9 |
| 35 | GO.1903507 | negative regulation of nucleic acid-templated transcription                      | 6.68E-9 |
| 39 | GO.0042592 | homeostatic process                                                              | 7.23E-9 |
| 13 | GO.0048754 | branching morphogenesis of an epithelial tube                                    | 7.31E-9 |
| 17 | GO.0090068 | positive regulation of cell cycle process                                        | 8.7E-9  |
| 16 | GO.0007611 | learning or memory                                                               | 9.55E-9 |
| 13 | GO.0071560 | cellular response to transforming growth factor beta stimulus                    | 1.15E-8 |
| 29 | GO.0022402 | cell cycle process                                                               | 1.59E-8 |
| 32 | GO.0007267 | cell-cell signaling                                                              | 1.59E-8 |
| 17 | GO.1901653 | cellular response to peptide                                                     | 1.89E-8 |
| 14 | GO.1904018 | positive regulation of vasculature development                                   | 1.94E-8 |
| 17 | GO.0009416 | response to light stimulus                                                       | 1.96E-8 |
| 26 | GO.0050767 | regulation of neurogenesis                                                       | 2.14E-8 |
| 36 | GO.0022414 | reproductive process                                                             | 2.18E-8 |
| 12 | GO.0001889 | liver development                                                                | 2.93E-8 |
| 15 | GO.0042110 | T cell activation                                                                | 3.58E-8 |
| 13 | GO.0030307 | positive regulation of cell growth                                               | 4.36E-8 |
| 15 | GO.0045165 | cell fate commitment                                                             | 4.63E-8 |
| 21 | GO.0032103 | positive regulation of response to external stimulus                             | 5.49E-8 |
| 27 | GO.0048646 | anatomical structure formation involved in morphogenesis                         | 6.12E-8 |
| 10 | GO.0031100 | animal organ regeneration                                                        | 6.54E-8 |
| 12 | GO.0045834 | positive regulation of lipid metabolic process                                   | 7.22E-8 |
| 37 | GO.0048468 | cell development                                                                 | 7.68E-8 |
| 15 | GO.0031334 | positive regulation of protein complex assembly                                  | 8.02E-8 |
| 28 | GO.0006915 | apoptotic process                                                                | 1.05E-7 |
| 14 | GO.0043281 | regulation of cysteine-type endopeptidase activity involved in apoptotic process | 1.09E-7 |
| 10 | GO.0001657 | ureteric bud development                                                         | 1.32E-7 |
| 10 | GO.0000079 | regulation of cyclin-dependent protein serine/threonine kinase activity          | 1.32E-7 |
| 11 | GO.0007498 | mesoderm development                                                             | 1.52E-7 |
| 20 | GO.0010035 | response to inorganic substance                                                  | 2.09E-7 |
| 31 | GO.0040011 | locomotion                                                                       | 2.22E-7 |
| 11 | GO.0045598 | regulation of fat cell differentiation                                           | 2.23E-7 |
| 18 | GO.1904951 | positive regulation of establishment of protein localization                     | 2.37E-7 |
| 10 | GO.0097191 | extrinsic apoptotic signaling pathway                                            | 2.5E-7  |
| 13 | GO.0050920 | regulation of chemotaxis                                                         | 2.5E-7  |
| 10 | GO.0090263 | positive regulation of canonical Wnt signaling pathway                           | 2.72E-7 |
| 26 | GO.0018193 | peptidyl-amino acid modification                                                 | 3.0E-7  |
| 13 | GO.0048872 | homeostasis of number of cells                                                   | 3.28E-7 |
| 22 | GO.0001817 | regulation of cytokine production                                                | 3.39E-7 |
| 32 | GO.0051336 | regulation of hydrolase activity                                                 | 3.54E-7 |
| 14 | GO.0097305 | response to alcohol                                                              | 3.6E-7  |
| 31 | GO.0051707 | response to other organism                                                       | 3.69E-7 |
| 20 | GO.1902532 | negative regulation of intracellular signal transduction                         | 4.02E-7 |
| 20 | GO.0044057 | regulation of system process                                                     | 4.23E-7 |
| 11 | GO.0008584 | male gonad development                                                           | 5.12E-7 |
| 8  | GO.0035019 | somatic stem cell population maintenance                                         | 5.87E-7 |
| 15 | GO.0040013 | negative regulation of locomotion                                                | 5.89E-7 |
| 10 | GO.2001237 | negative regulation of extrinsic apoptotic signaling pathway                     | 6.06E-7 |
| 17 | GO.0051052 | regulation of DNA metabolic process                                              | 6.82E-7 |
| 12 | GO.2001235 | positive regulation of apoptotic signaling pathway                               | 6.99E-7 |
| 14 | GO.0051091 | positive regulation of DNA-binding transcription factor activity                 | 7.63E-7 |
| 13 | GO.0044706 | multi-multicellular organism process                                             | 8.01E-7 |
| 16 | GO.0048589 | developmental growth                                                             | 8.35E-7 |
| 13 | GO.0001503 | ossification                                                                     | 9.67E-7 |
| 9  | GO.0070542 | response to fatty acid                                                           | 9.72E-7 |
| 72 | GO.0009058 | biosynthetic process                                                             | 9.73E-7 |

|    |            |                                                                                 |         |
|----|------------|---------------------------------------------------------------------------------|---------|
| 7  | GO.0090049 | regulation of cell migration involved in sprouting angiogenesis                 | 9.93E-7 |
| 9  | GO.0050673 | epithelial cell proliferation                                                   | 1.05E-6 |
| 14 | GO.1902105 | regulation of leukocyte differentiation                                         | 1.2E-6  |
| 9  | GO.1901216 | positive regulation of neuron death                                             | 1.25E-6 |
| 11 | GO.0051147 | regulation of muscle cell differentiation                                       | 1.36E-6 |
| 11 | GO.0010821 | regulation of mitochondrion organization                                        | 1.36E-6 |
| 18 | GO.0001501 | skeletal system development                                                     | 1.49E-6 |
| 19 | GO.0010817 | regulation of hormone levels                                                    | 1.55E-6 |
| 18 | GO.0090066 | regulation of anatomical structure size                                         | 1.81E-6 |
| 18 | GO.1903827 | regulation of cellular protein localization                                     | 1.85E-6 |
| 9  | GO.1901655 | cellular response to ketone                                                     | 1.85E-6 |
| 11 | GO.0010001 | glial cell differentiation                                                      | 1.89E-6 |
| 18 | GO.0051301 | cell division                                                                   | 3.1E-6  |
| 15 | GO.0062012 | regulation of small molecule metabolic process                                  | 3.15E-6 |
| 16 | GO.0003013 | circulatory system process                                                      | 3.2E-6  |
| 11 | GO.0071453 | cellular response to oxygen levels                                              | 3.32E-6 |
| 6  | GO.0003401 | axis elongation                                                                 | 3.35E-6 |
| 8  | GO.0008630 | intrinsic apoptotic signaling pathway in response to DNA damage                 | 3.8E-6  |
| 14 | GO.0001505 | regulation of neurotransmitter levels                                           | 4.43E-6 |
| 12 | GO.0009612 | response to mechanical stimulus                                                 | 4.72E-6 |
| 7  | GO.2001239 | regulation of extrinsic apoptotic signaling pathway in absence of ligand        | 4.77E-6 |
| 14 | GO.0002696 | positive regulation of leukocyte activation                                     | 4.88E-6 |
| 13 | GO.0006469 | negative regulation of protein kinase activity                                  | 5.06E-6 |
| 21 | GO.0031347 | regulation of defense response                                                  | 5.27E-6 |
| 13 | GO.0007568 | aging                                                                           | 5.27E-6 |
| 27 | GO.0046903 | secretion                                                                       | 6.1E-6  |
| 17 | GO.0061061 | muscle structure development                                                    | 6.46E-6 |
| 15 | GO.0051098 | regulation of binding                                                           | 6.83E-6 |
| 18 | GO.0007423 | sensory organ development                                                       | 7.02E-6 |
| 8  | GO.2000177 | regulation of neural precursor cell proliferation                               | 7.49E-6 |
| 12 | GO.0034599 | cellular response to oxidative stress                                           | 7.84E-6 |
| 15 | GO.1903532 | positive regulation of secretion by cell                                        | 8.76E-6 |
| 16 | GO.0048568 | embryonic organ development                                                     | 9.17E-6 |
| 14 | GO.0002237 | response to molecule of bacterial origin                                        | 9.3E-6  |
| 13 | GO.0010948 | negative regulation of cell cycle process                                       | 1.02E-5 |
| 10 | GO.0010212 | response to ionizing radiation                                                  | 1.03E-5 |
| 16 | GO.0050708 | regulation of protein secretion                                                 | 1.04E-5 |
| 13 | GO.0070372 | regulation of ERK1 and ERK2 cascade                                             | 1.05E-5 |
| 23 | GO.0009894 | regulation of catabolic process                                                 | 1.12E-5 |
| 14 | GO.0048545 | response to steroid hormone                                                     | 1.15E-5 |
| 5  | GO.0048339 | paraxial mesoderm development                                                   | 1.15E-5 |
| 8  | GO.0097327 | response to antineoplastic agent                                                | 1.37E-5 |
| 13 | GO.0071214 | cellular response to abiotic stimulus                                           | 1.38E-5 |
| 4  | GO.0007183 | SMAD protein complex assembly                                                   | 1.43E-5 |
| 8  | GO.0046620 | regulation of organ growth                                                      | 1.47E-5 |
| 10 | GO.2001242 | regulation of intrinsic apoptotic signaling pathway                             | 1.68E-5 |
| 8  | GO.0009791 | post-embryonic development                                                      | 1.68E-5 |
| 16 | GO.0010608 | posttranscriptional regulation of gene expression                               | 1.69E-5 |
| 36 | GO.0003008 | system process                                                                  | 1.91E-5 |
| 14 | GO.0031346 | positive regulation of cell projection organization                             | 2.04E-5 |
| 5  | GO.0060261 | positive regulation of transcription initiation from RNA polymerase II promoter | 2.06E-5 |
| 6  | GO.0070317 | negative regulation of G0 to G1 transition                                      | 2.1E-5  |
| 6  | GO.0010863 | positive regulation of phospholipase C activity                                 | 2.1E-5  |
| 9  | GO.0002687 | positive regulation of leukocyte migration                                      | 2.14E-5 |
| 7  | GO.1901992 | positive regulation of mitotic cell cycle phase transition                      | 2.24E-5 |
| 6  | GO.0090342 | regulation of cell aging                                                        | 2.67E-5 |
| 13 | GO.0046677 | response to antibiotic                                                          | 2.92E-5 |
| 5  | GO.0048103 | somatic stem cell division                                                      | 2.94E-5 |

|    |            |                                                                                   |         |
|----|------------|-----------------------------------------------------------------------------------|---------|
| 5  | GO.0030325 | adrenal gland development                                                         | 2.94E-5 |
| 13 | GO.0001701 | in utero embryonic development                                                    | 3.0E-5  |
| 6  | GO.1905207 | regulation of cardiocyte differentiation                                          | 3.35E-5 |
| 7  | GO.0030512 | negative regulation of transforming growth factor beta receptor signaling pathway | 3.43E-5 |
| 8  | GO.0021761 | limbic system development                                                         | 3.51E-5 |
| 10 | GO.0042594 | response to starvation                                                            | 3.53E-5 |
| 9  | GO.0001816 | cytokine production                                                               | 3.69E-5 |
| 7  | GO.0030279 | negative regulation of ossification                                               | 3.71E-5 |
| 9  | GO.0043524 | negative regulation of neuron apoptotic process                                   | 3.88E-5 |
| 9  | GO.0009746 | response to hexose                                                                | 3.88E-5 |
| 16 | GO.0051493 | regulation of cytoskeleton organization                                           | 4.06E-5 |
| 7  | GO.0034103 | regulation of tissue remodeling                                                   | 4.28E-5 |
| 6  | GO.0001541 | ovarian follicle development                                                      | 5.57E-5 |
| 6  | GO.0051496 | positive regulation of stress fiber assembly                                      | 6.16E-5 |
| 5  | GO.0071634 | regulation of transforming growth factor beta production                          | 6.33E-5 |
| 8  | GO.1900180 | regulation of protein localization to nucleus                                     | 6.66E-5 |
| 20 | GO.0006974 | cellular response to DNA damage stimulus                                          | 6.93E-5 |
| 23 | GO.0007010 | cytoskeleton organization                                                         | 7.06E-5 |
| 12 | GO.0060249 | anatomical structure homeostasis                                                  | 7.18E-5 |
| 6  | GO.0046626 | regulation of insulin receptor signaling pathway                                  | 7.39E-5 |
| 10 | GO.0061448 | connective tissue development                                                     | 7.64E-5 |
| 6  | GO.0060688 | regulation of morphogenesis of a branching structure                              | 8.06E-5 |
| 71 | GO.0051179 | localization                                                                      | 8.15E-5 |
| 17 | GO.0016032 | viral process                                                                     | 8.64E-5 |
| 7  | GO.0070661 | leukocyte proliferation                                                           | 8.73E-5 |
| 5  | GO.0071276 | cellular response to cadmium ion                                                  | 9.41E-5 |
| 5  | GO.0030212 | hyaluronan metabolic process                                                      | 9.41E-5 |
| 17 | GO.0010469 | regulation of signaling receptor activity                                         | 9.69E-5 |
| 9  | GO.0043409 | negative regulation of MAPK cascade                                               | 9.78E-5 |
| 4  | GO.1905564 | positive regulation of vascular endothelial cell proliferation                    | 1.0E-4  |
| 6  | GO.0072091 | regulation of stem cell proliferation                                             | 1.0E-4  |
| 6  | GO.0032768 | regulation of monooxygenase activity                                              | 1.0E-4  |
| 6  | GO.1902041 | regulation of extrinsic apoptotic signaling pathway via death domain receptors    | 1.1E-4  |
| 7  | GO.0031058 | positive regulation of histone modification                                       | 1.1E-4  |
| 4  | GO.2001028 | positive regulation of endothelial cell chemotaxis                                | 1.2E-4  |
| 30 | GO.0065003 | protein-containing complex assembly                                               | 1.2E-4  |
| 9  | GO.0048167 | regulation of synaptic plasticity                                                 | 1.2E-4  |
| 5  | GO.0043552 | positive regulation of phosphatidylinositol 3-kinase activity                     | 1.2E-4  |
| 8  | GO.0030879 | mammary gland development                                                         | 1.2E-4  |
| 9  | GO.0030324 | lung development                                                                  | 1.2E-4  |
| 10 | GO.0032872 | regulation of stress-activated MAPK cascade                                       | 1.3E-4  |
| 8  | GO.0032355 | response to estradiol                                                             | 1.3E-4  |
| 5  | GO.0007616 | long-term memory                                                                  | 1.3E-4  |
| 9  | GO.1902749 | regulation of cell cycle G2/M phase transition                                    | 1.4E-4  |
| 15 | GO.0032990 | cell part morphogenesis                                                           | 1.4E-4  |
| 4  | GO.1903798 | regulation of production of miRNAs involved in gene silencing by miRNA            | 1.5E-4  |
| 18 | GO.0055082 | cellular chemical homeostasis                                                     | 1.5E-4  |
| 9  | GO.0045216 | cell-cell junction organization                                                   | 1.5E-4  |
| 33 | GO.0044281 | small molecule metabolic process                                                  | 1.5E-4  |
| 5  | GO.0043491 | protein kinase B signaling                                                        | 1.5E-4  |
| 9  | GO.0042593 | glucose homeostasis                                                               | 1.5E-4  |
| 5  | GO.0034405 | response to fluid shear stress                                                    | 1.5E-4  |
| 6  | GO.0048015 | phosphatidylinositol-mediated signaling                                           | 1.6E-4  |
| 5  | GO.0033619 | membrane protein proteolysis                                                      | 1.6E-4  |
| 7  | GO.0022612 | gland morphogenesis                                                               | 1.7E-4  |
| 15 | GO.0006935 | chemotaxis                                                                        | 1.9E-4  |
| 3  | GO.0060011 | Sertoli cell proliferation                                                        | 2.1E-4  |
| 11 | GO.0009895 | negative regulation of catabolic process                                          | 2.2E-4  |
| 6  | GO.0045670 | regulation of osteoclast differentiation                                          | 2.3E-4  |

|    |            |                                                                        |        |
|----|------------|------------------------------------------------------------------------|--------|
| 8  | GO.0055123 | digestive system development                                           | 2.4E-4 |
| 6  | GO.0061333 | renal tubule morphogenesis                                             | 2.5E-4 |
| 6  | GO.0001837 | epithelial to mesenchymal transition                                   | 2.5E-4 |
| 3  | GO.0070141 | response to UV-A                                                       | 3.0E-4 |
| 10 | GO.0045926 | negative regulation of growth                                          | 3.0E-4 |
| 3  | GO.0035234 | ectopic germ cell programmed cell death                                | 3.0E-4 |
| 10 | GO.0003007 | heart morphogenesis                                                    | 3.0E-4 |
| 3  | GO.0002246 | wound healing involved in inflammatory response                        | 3.0E-4 |
| 7  | GO.0051781 | positive regulation of cell division                                   | 3.3E-4 |
| 17 | GO.0030855 | epithelial cell differentiation                                        | 3.4E-4 |
| 5  | GO.0033077 | T cell differentiation in thymus                                       | 3.6E-4 |
| 6  | GO.1900407 | regulation of cellular response to oxidative stress                    | 3.7E-4 |
| 8  | GO.0007050 | cell cycle arrest                                                      | 3.7E-4 |
| 8  | GO.0000187 | activation of MAPK activity                                            | 3.7E-4 |
| 5  | GO.0090199 | regulation of release of cytochrome c from mitochondria                | 3.9E-4 |
| 5  | GO.0046638 | positive regulation of alpha-beta T cell differentiation               | 3.9E-4 |
| 6  | GO.0021536 | diencephalon development                                               | 4.0E-4 |
| 6  | GO.0050772 | positive regulation of axonogenesis                                    | 4.2E-4 |
| 6  | GO.0033143 | regulation of intracellular steroid hormone receptor signaling pathway | 4.2E-4 |
| 9  | GO.0009952 | anterior/posterior pattern specification                               | 4.2E-4 |
| 7  | GO.0045667 | regulation of osteoblast differentiation                               | 4.3E-4 |
| 4  | GO.0090312 | positive regulation of protein deacetylation                           | 4.5E-4 |
| 4  | GO.0070723 | response to cholesterol                                                | 4.5E-4 |
| 4  | GO.0033688 | regulation of osteoblast proliferation                                 | 4.5E-4 |
| 10 | GO.0040029 | regulation of gene expression, epigenetic                              | 4.8E-4 |
| 7  | GO.0001704 | formation of primary germ layer                                        | 4.9E-4 |
| 4  | GO.2000679 | positive regulation of transcription regulatory region DNA binding     | 5.1E-4 |
| 4  | GO.0048169 | regulation of long-term neuronal synaptic plasticity                   | 5.1E-4 |
| 10 | GO.0044772 | mitotic cell cycle phase transition                                    | 5.2E-4 |
| 6  | GO.0042058 | regulation of epidermal growth factor receptor signaling pathway       | 5.4E-4 |
| 5  | GO.0035094 | response to nicotine                                                   | 5.4E-4 |
| 3  | GO.0032667 | regulation of interleukin-23 production                                | 5.4E-4 |
| 6  | GO.0010631 | epithelial cell migration                                              | 5.4E-4 |
| 3  | GO.0006268 | DNA unwinding involved in DNA replication                              | 5.4E-4 |
| 11 | GO.0032102 | negative regulation of response to external stimulus                   | 5.7E-4 |
| 4  | GO.2000406 | positive regulation of T cell migration                                | 5.8E-4 |
| 4  | GO.1902895 | positive regulation of pri-miRNA transcription by RNA polymerase II    | 5.8E-4 |
| 5  | GO.0046632 | alpha-beta T cell differentiation                                      | 5.9E-4 |
| 16 | GO.0043269 | regulation of ion transport                                            | 6.0E-4 |
| 6  | GO.0008286 | insulin receptor signaling pathway                                     | 6.0E-4 |
| 5  | GO.0060071 | Wnt signaling pathway, planar cell polarity pathway                    | 6.3E-4 |
| 6  | GO.0034101 | erythrocyte homeostasis                                                | 6.3E-4 |
| 6  | GO.0001649 | osteoblast differentiation                                             | 6.3E-4 |
| 4  | GO.0050927 | positive regulation of positive chemotaxis                             | 6.5E-4 |
| 4  | GO.0031929 | TOR signaling                                                          | 6.5E-4 |
| 5  | GO.0048641 | regulation of skeletal muscle tissue development                       | 6.8E-4 |
| 8  | GO.0060348 | bone development                                                       | 6.9E-4 |
| 3  | GO.0010455 | positive regulation of cell fate commitment                            | 6.9E-4 |
| 6  | GO.2000106 | regulation of leukocyte apoptotic process                              | 7.0E-4 |
| 6  | GO.0071158 | positive regulation of cell cycle arrest                               | 7.0E-4 |
| 4  | GO.0010575 | positive regulation of vascular endothelial growth factor production   | 7.3E-4 |
| 16 | GO.0051129 | negative regulation of cellular component organization                 | 7.4E-4 |
| 9  | GO.0021700 | developmental maturation                                               | 7.4E-4 |
| 16 | GO.0007276 | gamete generation                                                      | 7.4E-4 |
| 5  | GO.0061515 | myeloid cell development                                               | 7.8E-4 |
| 10 | GO.0009615 | response to virus                                                      | 7.9E-4 |
| 4  | GO.0035196 | production of miRNAs involved in gene silencing by miRNA               | 8.1E-4 |

|    |            |                                                                                            |        |
|----|------------|--------------------------------------------------------------------------------------------|--------|
| 3  | GO.1900122 | positive regulation of receptor binding                                                    | 8.6E-4 |
| 3  | GO.0060068 | vagina development                                                                         | 8.6E-4 |
| 3  | GO.0051574 | positive regulation of histone H3-K9 methylation                                           | 8.6E-4 |
| 3  | GO.0048143 | astrocyte activation                                                                       | 8.6E-4 |
| 3  | GO.0045792 | negative regulation of cell size                                                           | 8.6E-4 |
| 6  | GO.0045639 | positive regulation of myeloid cell differentiation                                        | 8.6E-4 |
| 6  | GO.0009408 | response to heat                                                                           | 8.6E-4 |
| 14 | GO.0051259 | protein complex oligomerization                                                            | 8.9E-4 |
| 4  | GO.0048147 | negative regulation of fibroblast proliferation                                            | 8.9E-4 |
| 4  | GO.0040036 | regulation of fibroblast growth factor receptor signaling pathway                          | 8.9E-4 |
| 13 | GO.0051051 | negative regulation of transport                                                           | 9.0E-4 |
| 7  | GO.0046887 | positive regulation of hormone secretion                                                   | 9.0E-4 |
| 22 | GO.1901135 | carbohydrate derivative metabolic process                                                  | 9.3E-4 |
| 8  | GO.0071216 | cellular response to biotic stimulus                                                       | 9.5E-4 |
| 4  | GO.0071542 | dopaminergic neuron differentiation                                                        | 9.9E-4 |
| 4  | GO.0033280 | response to vitamin D                                                                      | 9.9E-4 |
| 6  | GO.0060070 | canonical Wnt signaling pathway                                                            | 0.001  |
| 3  | GO.2000615 | regulation of histone H3-K9 acetylation                                                    | 0.0011 |
| 3  | GO.0014745 | negative regulation of muscle adaptation                                                   | 0.0011 |
| 4  | GO.1905332 | positive regulation of morphogenesis of an epithelium                                      | 0.0012 |
| 4  | GO.0090398 | cellular senescence                                                                        | 0.0012 |
| 5  | GO.0061098 | positive regulation of protein tyrosine kinase activity                                    | 0.0012 |
| 5  | GO.0060135 | maternal process involved in female pregnancy                                              | 0.0012 |
| 4  | GO.0051150 | regulation of smooth muscle cell differentiation                                           | 0.0012 |
| 4  | GO.0051145 | smooth muscle cell differentiation                                                         | 0.0012 |
| 4  | GO.0043537 | negative regulation of blood vessel endothelial cell migration                             | 0.0012 |
| 5  | GO.0019229 | regulation of vasoconstriction                                                             | 0.0012 |
| 10 | GO.0010506 | regulation of autophagy                                                                    | 0.0012 |
| 5  | GO.0006940 | regulation of smooth muscle contraction                                                    | 0.0012 |
| 4  | GO.0048873 | homeostasis of number of cells within a tissue                                             | 0.0013 |
| 3  | GO.0043149 | stress fiber assembly                                                                      | 0.0013 |
| 4  | GO.0043029 | T cell homeostasis                                                                         | 0.0013 |
| 5  | GO.0042698 | ovulation cycle                                                                            | 0.0013 |
| 4  | GO.0010165 | response to X-ray                                                                          | 0.0013 |
| 8  | GO.0002699 | positive regulation of immune effector process                                             | 0.0013 |
| 5  | GO.0061035 | regulation of cartilage development                                                        | 0.0014 |
| 5  | GO.0021872 | forebrain generation of neurons                                                            | 0.0014 |
| 4  | GO.1900271 | regulation of long-term synaptic potentiation                                              | 0.0015 |
| 4  | GO.0097421 | liver regeneration                                                                         | 0.0015 |
| 3  | GO.0032740 | positive regulation of interleukin-17 production                                           | 0.0015 |
| 10 | GO.0030198 | extracellular matrix organization                                                          | 0.0015 |
| 6  | GO.0006282 | regulation of DNA repair                                                                   | 0.0015 |
| 10 | GO.0001525 | angiogenesis                                                                               | 0.0015 |
| 6  | GO.0043200 | response to amino acid                                                                     | 0.0016 |
| 4  | GO.0030501 | positive regulation of bone mineralization                                                 | 0.0016 |
| 13 | GO.0006954 | inflammatory response                                                                      | 0.0016 |
| 6  | GO.0002573 | myeloid leukocyte differentiation                                                          | 0.0016 |
| 5  | GO.2000736 | regulation of stem cell differentiation                                                    | 0.0017 |
| 5  | GO.0051785 | positive regulation of nuclear division                                                    | 0.0017 |
| 5  | GO.0043618 | regulation of transcription from RNA polymerase II promoter in response to stress          | 0.0017 |
| 4  | GO.0035924 | cellular response to vascular endothelial growth factor stimulus                           | 0.0017 |
| 4  | GO.0032885 | regulation of polysaccharide biosynthetic process                                          | 0.0017 |
| 5  | GO.1901224 | positive regulation of NIK/NF-kappaB signaling                                             | 0.0019 |
| 2  | GO.0032916 | positive regulation of transforming growth factor beta3 production                         | 0.002  |
| 3  | GO.2001267 | regulation of cysteine-type endopeptidase activity involved in apoptotic signaling pathway | 0.0021 |
| 7  | GO.0019318 | hexose metabolic process                                                                   | 0.0021 |
| 8  | GO.0048705 | skeletal system morphogenesis                                                              | 0.0022 |



|    |            |                                                                                                      |        |
|----|------------|------------------------------------------------------------------------------------------------------|--------|
| 7  | GO.0030178 | negative regulation of Wnt signaling pathway                                                         | 0.0022 |
| 7  | GO.0007265 | Ras protein signal transduction                                                                      | 0.0022 |
| 6  | GO.0032273 | positive regulation of protein polymerization                                                        | 0.0023 |
| 5  | GO.0031016 | pancreas development                                                                                 | 0.0023 |
| 6  | GO.0006941 | striated muscle contraction                                                                          | 0.0023 |
| 3  | GO.0051481 | negative regulation of cytosolic calcium ion concentration                                           | 0.0024 |
| 4  | GO.0051402 | neuron apoptotic process                                                                             | 0.0024 |
| 5  | GO.0043627 | response to estrogen                                                                                 | 0.0025 |
| 7  | GO.0031589 | cell-substrate adhesion                                                                              | 0.0027 |
| 11 | GO.0044282 | small molecule catabolic process                                                                     | 0.0028 |
| 6  | GO.0050864 | regulation of B cell activation                                                                      | 0.0029 |
| 6  | GO.0001764 | neuron migration                                                                                     | 0.0029 |
| 8  | GO.0034612 | response to tumor necrosis factor                                                                    | 0.003  |
| 4  | GO.1990090 | cellular response to nerve growth factor stimulus                                                    | 0.0031 |
| 3  | GO.0060749 | mammary gland alveolus development                                                                   | 0.0031 |
| 4  | GO.0060425 | lung morphogenesis                                                                                   | 0.0031 |
| 4  | GO.0048662 | negative regulation of smooth muscle cell proliferation                                              | 0.0031 |
| 4  | GO.0035272 | exocrine system development                                                                          | 0.0031 |
| 2  | GO.0032227 | negative regulation of synaptic transmission, dopaminergic                                           | 0.0031 |
| 6  | GO.0030168 | platelet activation                                                                                  | 0.0031 |
| 3  | GO.0010592 | positive regulation of lamellipodium assembly                                                        | 0.0031 |
| 5  | GO.0055007 | cardiac muscle cell differentiation                                                                  | 0.0032 |
| 4  | GO.0045843 | negative regulation of striated muscle tissue development                                            | 0.0034 |
| 3  | GO.2000178 | negative regulation of neural precursor cell proliferation                                           | 0.0035 |
| 6  | GO.0043280 | positive regulation of cysteine-type endopeptidase activity involved in apoptotic process            | 0.0035 |
| 7  | GO.0030522 | intracellular receptor signaling pathway                                                             | 0.0037 |
| 7  | GO.0070507 | regulation of microtubule cytoskeleton organization                                                  | 0.0042 |
| 7  | GO.0008217 | regulation of blood pressure                                                                         | 0.0042 |
| 2  | GO.2000741 | positive regulation of mesenchymal stem cell differentiation                                         | 0.0043 |
| 3  | GO.2000637 | positive regulation of gene silencing by miRNA                                                       | 0.0043 |
| 4  | GO.1904705 | regulation of vascular smooth muscle cell proliferation                                              | 0.0043 |
| 6  | GO.0062013 | positive regulation of small molecule metabolic process                                              | 0.0043 |
| 2  | GO.0060665 | regulation of branching involved in salivary gland morphogenesis by mesenchymal-epithelial signaling | 0.0043 |
| 3  | GO.0060444 | branching involved in mammary gland duct morphogenesis                                               | 0.0043 |
| 2  | GO.0021764 | amygdala development                                                                                 | 0.0043 |
| 5  | GO.0019217 | regulation of fatty acid metabolic process                                                           | 0.0043 |
| 2  | GO.0014042 | positive regulation of neuron maturation                                                             | 0.0043 |
| 4  | GO.0002762 | negative regulation of myeloid leukocyte differentiation                                             | 0.0043 |
| 17 | GO.0007155 | cell adhesion                                                                                        | 0.0044 |
| 6  | GO.0048863 | stem cell differentiation                                                                            | 0.0045 |
| 4  | GO.2000378 | negative regulation of reactive oxygen species metabolic process                                     | 0.0046 |
| 4  | GO.0051148 | negative regulation of muscle cell differentiation                                                   | 0.0046 |
| 3  | GO.0010288 | response to lead ion                                                                                 | 0.0048 |
| 6  | GO.0061013 | regulation of mRNA catabolic process                                                                 | 0.005  |
| 6  | GO.0009306 | protein secretion                                                                                    | 0.005  |
| 9  | GO.0010721 | negative regulation of cell development                                                              | 0.0051 |
| 4  | GO.0007173 | epidermal growth factor receptor signaling pathway                                                   | 0.0051 |
| 5  | GO.1990830 | cellular response to leukemia inhibitory factor                                                      | 0.0053 |
| 3  | GO.1902667 | regulation of axon guidance                                                                          | 0.0053 |
| 3  | GO.0071379 | cellular response to prostaglandin stimulus                                                          | 0.0053 |
| 3  | GO.0062009 | secondary palate development                                                                         | 0.0053 |
| 5  | GO.0044070 | regulation of anion transport                                                                        | 0.0053 |
| 4  | GO.0032655 | regulation of interleukin-12 production                                                              | 0.0054 |
| 10 | GO.0031349 | positive regulation of defense response                                                              | 0.0055 |
| 2  | GO.1903223 | positive regulation of oxidative stress-induced neuron death                                         | 0.0056 |
| 13 | GO.0044283 | small molecule biosynthetic process                                                                  | 0.0056 |
| 6  | GO.0031098 | stress-activated protein kinase signaling cascade                                                    | 0.0056 |
| 2  | GO.0018401 | peptidyl-proline hydroxylation to 4-hydroxy-L-proline                                                | 0.0056 |
| 2  | GO.0002551 | mast cell chemotaxis                                                                                 | 0.0056 |

|    |            |                                                                                           |        |
|----|------------|-------------------------------------------------------------------------------------------|--------|
| 5  | GO.0062014 | negative regulation of small molecule metabolic process                                   | 0.0057 |
| 5  | GO.0042552 | myelination                                                                               | 0.0057 |
| 8  | GO.0007162 | negative regulation of cell adhesion                                                      | 0.0057 |
| 8  | GO.0001818 | negative regulation of cytokine production                                                | 0.0057 |
| 5  | GO.1902850 | microtubule cytoskeleton organization involved in mitosis                                 | 0.006  |
| 8  | GO.0090596 | sensory organ morphogenesis                                                               | 0.006  |
| 5  | GO.0072527 | pyrimidine-containing compound metabolic process                                          | 0.006  |
| 5  | GO.0048771 | tissue remodeling                                                                         | 0.006  |
| 6  | GO.0051092 | positive regulation of NF-kappaB transcription factor activity                            | 0.0064 |
| 3  | GO.0021591 | ventricular system development                                                            | 0.0064 |
| 7  | GO.0097237 | cellular response to toxic substance                                                      | 0.0065 |
| 4  | GO.0031532 | actin cytoskeleton reorganization                                                         | 0.0067 |
| 5  | GO.0014066 | regulation of phosphatidylinositol 3-kinase signaling                                     | 0.0067 |
| 3  | GO.0070306 | lens fiber cell differentiation                                                           | 0.007  |
| 3  | GO.0060251 | regulation of glial cell proliferation                                                    | 0.007  |
| 2  | GO.0060527 | prostate epithelial cord arborization involved in prostate glandular acinus morphogenesis | 0.0071 |
| 14 | GO.0055086 | nucleobase-containing small molecule metabolic process                                    | 0.0071 |
| 2  | GO.0042713 | sperm ejaculation                                                                         | 0.0071 |
| 2  | GO.0031536 | positive regulation of exit from mitosis                                                  | 0.0071 |
| 2  | GO.0030579 | ubiquitin-dependent SMAD protein catabolic process                                        | 0.0071 |
| 6  | GO.0070555 | response to interleukin-1                                                                 | 0.0072 |
| 10 | GO.0097435 | supramolecular fiber organization                                                         | 0.0073 |
| 4  | GO.0045600 | positive regulation of fat cell differentiation                                           | 0.0073 |
| 5  | GO.0045444 | fat cell differentiation                                                                  | 0.0074 |
| 3  | GO.0031128 | developmental induction                                                                   | 0.0074 |
| 9  | GO.0022412 | cellular process involved in reproduction in multicellular organism                       | 0.0074 |
| 3  | GO.0001702 | gastrulation with mouth forming second                                                    | 0.0074 |
| 5  | GO.2000181 | negative regulation of blood vessel morphogenesis                                         | 0.0076 |
| 4  | GO.0042531 | positive regulation of tyrosine phosphorylation of STAT protein                           | 0.0077 |
| 8  | GO.0009410 | response to xenobiotic stimulus                                                           | 0.0079 |
| 5  | GO.0072593 | reactive oxygen species metabolic process                                                 | 0.0081 |
| 3  | GO.0033032 | regulation of myeloid cell apoptotic process                                              | 0.0081 |
| 4  | GO.0021885 | forebrain cell migration                                                                  | 0.0081 |
| 5  | GO.0021510 | spinal cord development                                                                   | 0.0081 |
| 4  | GO.0014910 | regulation of smooth muscle cell migration                                                | 0.0081 |
| 2  | GO.2000138 | positive regulation of cell proliferation involved in heart morphogenesis                 | 0.0087 |
| 2  | GO.0090270 | regulation of fibroblast growth factor production                                         | 0.0087 |
| 2  | GO.0042661 | regulation of mesodermal cell fate specification                                          | 0.0087 |
| 2  | GO.0031077 | post-embryonic camera-type eye development                                                | 0.0087 |
| 13 | GO.0007017 | microtubule-based process                                                                 | 0.0087 |
| 6  | GO.0051701 | interaction with host                                                                     | 0.0092 |
| 6  | GO.0006338 | chromatin remodeling                                                                      | 0.0092 |
| 3  | GO.1900181 | negative regulation of protein localization to nucleus                                    | 0.0093 |
| 5  | GO.0071773 | cellular response to BMP stimulus                                                         | 0.0093 |
| 3  | GO.0030947 | regulation of vascular endothelial growth factor receptor signaling pathway               | 0.0093 |
| 6  | GO.0002695 | negative regulation of leukocyte activation                                               | 0.0093 |
| 3  | GO.0001662 | behavioral fear response                                                                  | 0.0093 |
| 4  | GO.0071333 | cellular response to glucose stimulus                                                     | 0.0096 |
| 4  | GO.0051926 | negative regulation of calcium ion transport                                              | 0.0096 |
| 7  | GO.0043393 | regulation of protein binding                                                             | 0.0096 |
| 4  | GO.0001570 | vasculogenesis                                                                            | 0.0096 |
| 5  | GO.0021987 | cerebral cortex development                                                               | 0.0098 |
| 17 | GO.0002252 | immune effector process                                                                   | 0.0098 |

**Table S4.** KEGG pathways enrichment results for terms with FDR  $P < 0.01$ 

| Number of Genes | Term name | Description                                              | FDR      |
|-----------------|-----------|----------------------------------------------------------|----------|
| 46              | hsa05200  | Pathways in cancer                                       | 5.42E-30 |
| 30              | hsa05206  | MicroRNAs in cancer                                      | 2.45E-28 |
| 29              | hsa05205  | Proteoglycans in cancer                                  | 3.71E-24 |
| 34              | hsa04151  | PI3K-Akt signaling pathway                               | 3.18E-23 |
| 20              | hsa05212  | Pancreatic cancer                                        | 4.66E-21 |
| 23              | hsa05224  | Breast cancer                                            | 9.96E-20 |
| 22              | hsa04218  | Cellular senescence                                      | 4.46E-18 |
| 18              | hsa05215  | Prostate cancer                                          | 1.09E-16 |
| 18              | hsa04933  | AGE-RAGE signaling pathway in diabetic complications     | 1.18E-16 |
| 24              | hsa05166  | HTLV-I infection                                         | 2.15E-16 |
| 25              | hsa04010  | MAPK signaling pathway                                   | 4.93E-16 |
| 16              | hsa01521  | EGFR tyrosine kinase inhibitor resistance                | 1.32E-15 |
| 18              | hsa04068  | FoxO signaling pathway                                   | 6.47E-15 |
| 17              | hsa04550  | Signaling pathways regulating pluripotency of stem cells | 2.26E-13 |
| 16              | hsa05418  | Fluid shear stress and atherosclerosis                   | 1.61E-12 |
| 15              | hsa04110  | Cell cycle                                               | 7.32E-12 |
| 13              | hsa05222  | Small cell lung cancer                                   | 4.61E-11 |
| 15              | hsa04150  | mTOR signaling pathway                                   | 7.55E-11 |
| 13              | hsa04066  | HIF-1 signaling pathway                                  | 8.58E-11 |
| 16              | hsa05203  | Viral carcinogenesis                                     | 1.11E-10 |
| 15              | hsa04630  | Jak-STAT signaling pathway                               | 1.91E-10 |
| 14              | hsa04910  | Insulin signaling pathway                                | 2.32E-10 |
| 16              | hsa04510  | Focal adhesion                                           | 2.83E-10 |
| 11              | hsa05230  | Central carbon metabolism in cancer                      | 2.85E-10 |
| 12              | hsa04211  | Longevity regulating pathway                             | 3.33E-10 |
| 14              | hsa04310  | Wnt signaling pathway                                    | 4.37E-10 |
| 13              | hsa04722  | Neurotrophin signaling pathway                           | 4.46E-10 |
| 13              | hsa04926  | Relaxin signaling pathway                                | 1.6E-9   |
| 9               | hsa05219  | Bladder cancer                                           | 1.93E-9  |
| 13              | hsa05162  | Measles                                                  | 1.98E-9  |
| 10              | hsa05221  | Acute myeloid leukemia                                   | 4.61E-9  |
| 10              | hsa05211  | Renal cell carcinoma                                     | 5.86E-9  |
| 10              | hsa04917  | Prolactin signaling pathway                              | 6.53E-9  |
| 10              | hsa04520  | Adherens junction                                        | 7.92E-9  |
| 12              | hsa04371  | Apelin signaling pathway                                 | 1.88E-8  |
| 9               | hsa05213  | Endometrial cancer                                       | 2.36E-8  |
| 13              | hsa05152  | Tuberculosis                                             | 2.9E-8   |
| 11              | hsa04919  | Thyroid hormone signaling pathway                        | 4.43E-8  |
| 11              | hsa04380  | Osteoclast differentiation                               | 8.98E-8  |
| 10              | hsa04668  | TNF signaling pathway                                    | 2.7E-7   |
| 9               | hsa04350  | TGF-beta signaling pathway                               | 3.54E-7  |
| 11              | hsa04934  | Cushing's syndrome                                       | 6.23E-7  |
| 10              | hsa05160  | Hepatitis C                                              | 1.35E-6  |
| 9               | hsa04660  | T cell receptor signaling pathway                        | 1.35E-6  |
| 10              | hsa04915  | Estrogen signaling pathway                               | 1.5E-6   |
| 9               | hsa05142  | Chagas disease (American trypanosomiasis)                | 1.51E-6  |
| 7               | hsa05321  | Inflammatory bowel disease (IBD)                         | 6.87E-6  |
| 9               | hsa04140  | Autophagy - animal                                       | 7.61E-6  |
| 10              | hsa05202  | Transcriptional misregulation in cancer                  | 1.08E-5  |
| 7               | hsa04920  | Adipocytokine signaling pathway                          | 1.25E-5  |
| 8               | hsa04922  | Glucagon signaling pathway                               | 1.29E-5  |
| 9               | hsa04932  | Non-alcoholic fatty liver disease (NAFLD)                | 2.63E-5  |
| 9               | hsa04022  | cGMP-PKG signaling pathway                               | 4.41E-5  |
| 11              | hsa04060  | Cytokine-cytokine receptor interaction                   | 7.03E-5  |
| 6               | hsa05217  | Basal cell carcinoma                                     | 7.8E-5   |
| 7               | hsa04916  | Melanogenesis                                            | 9.3E-5   |

|   |          |                                                            |         |
|---|----------|------------------------------------------------------------|---------|
| 6 | hsa05120 | Epithelial cell signaling in Helicobacter pylori infection | 9.72E-5 |
| 6 | hsa05140 | Leishmaniasis                                              | 1.3E-4  |
| 5 | hsa04930 | Type II diabetes mellitus                                  | 1.9E-4  |
| 5 | hsa05014 | Amyotrophic lateral sclerosis (ALS)                        | 2.7E-4  |
| 7 | hsa04921 | Oxytocin signaling pathway                                 | 9.6E-4  |
| 4 | hsa05216 | Thyroid cancer                                             | 9.9E-4  |
| 4 | hsa04973 | Carbohydrate digestion and absorption                      | 0.0015  |
| 4 | hsa04340 | Hedgehog signaling pathway                                 | 0.0021  |
| 4 | hsa04330 | Notch signaling pathway                                    | 0.0024  |
| 5 | hsa04666 | Fc gamma R-mediated phagocytosis                           | 0.0029  |
| 4 | hsa04923 | Regulation of lipolysis in adipocytes                      | 0.0033  |
| 5 | hsa04657 | IL-17 signaling pathway                                    | 0.0033  |
| 6 | hsa04261 | Adrenergic signaling in cardiomyocytes                     | 0.0035  |
| 7 | hsa04810 | Regulation of actin cytoskeleton                           | 0.0052  |
| 5 | hsa04726 | Serotonergic synapse                                       | 0.0072  |
| 5 | hsa04670 | Leukocyte transendothelial migration                       | 0.0072  |
| 6 | hsa04530 | Tight junction                                             | 0.0078  |
| 7 | hsa04714 | Thermogenesis                                              | 0.0086  |
| 4 | hsa05133 | Pertussis                                                  | 0.0093  |
| 3 | hsa04960 | Aldosterone-regulated sodium reabsorption                  | 0.0098  |

**Table S5.** Reactome pathways enrichment results for terms with FDR  $P < 0.01$ 

| Number of Genes | Term name   | Description                                                                                 | FDR      |
|-----------------|-------------|---------------------------------------------------------------------------------------------|----------|
| 31              | HSA-9006934 | Signaling by Receptor Tyrosine Kinases                                                      | 2.06E-16 |
| 19              | HSA-6785807 | Interleukin-4 and Interleukin-13 signaling                                                  | 2.91E-16 |
| 27              | HSA-5663202 | Diseases of signal transduction                                                             | 6.66E-15 |
| 43              | HSA-212436  | Generic Transcription Pathway                                                               | 1.45E-14 |
| 13              | HSA-2219528 | PI3K/AKT Signaling in Cancer                                                                | 1.87E-10 |
| 10              | HSA-8848021 | Signaling by PTK6                                                                           | 7.28E-9  |
| 46              | HSA-168256  | Immune System                                                                               | 8.36E-9  |
| 12              | HSA-194138  | Signaling by VEGF                                                                           | 1.76E-8  |
| 12              | HSA-453279  | Mitotic G1-G1/S phases                                                                      | 4.76E-7  |
| 13              | HSA-157118  | Signaling by NOTCH                                                                          | 1.24E-6  |
| 10              | HSA-8878166 | Transcriptional regulation by RUNX2                                                         | 4.49E-6  |
| 16              | HSA-3700989 | Transcriptional Regulation by TP53                                                          | 5.16E-6  |
| 27              | HSA-1266738 | Developmental Biology                                                                       | 8.09E-6  |
| 6               | HSA-114452  | Activation of BH3-only proteins                                                             | 1.39E-5  |
| 5               | HSA-8934593 | Regulation of RUNX1 Expression and Activity                                                 | 2.78E-5  |
| 13              | HSA-5683057 | MAPK family signaling cascades                                                              | 2.78E-5  |
| 6               | HSA-6804757 | Regulation of TP53 Degradation                                                              | 2.87E-5  |
| 19              | HSA-109582  | Hemostasis                                                                                  | 3.2E-5   |
| 8               | HSA-8878159 | Transcriptional regulation by RUNX3                                                         | 4.07E-5  |
| 10              | HSA-2559583 | Cellular Senescence                                                                         | 4.08E-5  |
| 13              | HSA-195721  | Signaling by WNT                                                                            | 4.31E-5  |
| 6               | HSA-1433557 | Signaling by SCF-KIT                                                                        | 4.52E-5  |
| 6               | HSA-1236394 | Signaling by ERBB4                                                                          | 5.71E-5  |
| 4               | HSA-8866910 | TFAP2 (AP-2) family regulates transcription of growth factors and their receptors           | 9.88E-5  |
| 4               | HSA-877312  | Regulation of IFNG signaling                                                                | 1.3E-4   |
| 6               | HSA-8986944 | Transcriptional Regulation by MECP2                                                         | 2.2E-4   |
| 4               | HSA-3772470 | Negative regulation of TCF-dependent signaling by WNT ligand antagonists                    | 2.2E-4   |
| 3               | HSA-211163  | AKT-mediated inactivation of FOXO1A                                                         | 2.5E-4   |
| 7               | HSA-166520  | Signaling by NTRKs                                                                          | 3.5E-4   |
| 3               | HSA-8849470 | PTK6 Regulates Cell Cycle                                                                   | 5.2E-4   |
| 5               | HSA-177929  | Signaling by EGFR                                                                           | 5.2E-4   |
| 5               | HSA-1227986 | Signaling by ERBB2                                                                          | 7.7E-4   |
| 3               | HSA-8951936 | RUNX3 regulates p14-ARF                                                                     | 0.0011   |
| 4               | HSA-1538133 | G0 and Early G1                                                                             | 0.0012   |
| 5               | HSA-168643  | Nucleotide-binding domain, leucine rich repeat containing receptor (NLR) signaling pathways | 0.0013   |
| 10              | HSA-5688426 | Deubiquitination                                                                            | 0.0017   |
| 3               | HSA-9013700 | NOTCH4 Activation and Transmission of Signal to the Nucleus                                 | 0.0018   |
| 7               | HSA-73887   | Death Receptor Signalling                                                                   | 0.002    |
| 3               | HSA-75035   | Chk1/Chk2(Cds1) mediated inactivation of Cyclin B:Cdk1 complex                              | 0.0024   |
| 3               | HSA-8849471 | PTK6 Regulates RHO GTPases, RAS GTPase and MAP kinases                                      | 0.0029   |
| 3               | HSA-6804116 | TP53 Regulates Transcription of Genes Involved in G1 Cell Cycle Arrest                      | 0.0029   |
| 4               | HSA-5689896 | Ovarian tumor domain proteases                                                              | 0.0032   |
| 3               | HSA-2173791 | TGF-beta receptor signaling in EMT (epithelial to mesenchymal transition)                   | 0.0038   |
| 3               | HSA-881907  | Gastrin-CREB signalling pathway via PKC and MAPK                                            | 0.0043   |
| 3               | HSA-450604  | KSRP (KHSRP) binds and destabilizes mRNA                                                    | 0.0043   |
| 3               | HSA-445144  | Signal transduction by L1                                                                   | 0.0061   |
| 5               | HSA-381340  | Transcriptional regulation of white adipocyte differentiation                               | 0.0061   |
| 2               | HSA-9032759 | NTRK2 activates RAC1                                                                        | 0.0066   |
| 2               | HSA-209563  | Axonal growth stimulation                                                                   | 0.0066   |
| 4               | HSA-3928665 | EPH-ephrin mediated repulsion of cells                                                      | 0.0069   |
| 5               | HSA-6804756 | Regulation of TP53 Activity through Phosphorylation                                         | 0.0084   |
